# Supplementary material
Source: MDPI journal article supplement (https://www.mdpi.com/2073-4433/13/1/124)
Supplement: s1 [file s1]

## Supplementary Materials

# In-Depth Analysis of Physicochemical Properties of Particulate Matter (PM<sub>10</sub>, PM<sub>2.5</sub> and PM<sub>1</sub>) and Its Characterization through FTIR, XRD and SEM–EDX Techniques in the Foothills of the Hindu Kush Region of Northern Pakistan

Farooq Usman <sup>1</sup>, Bahadar Zeb <sup>2</sup>, Khan Alam <sup>3,4,\*</sup>, Zhongwei Huang <sup>4</sup>, Attaullah Shah <sup>5</sup>, Iftikhar Ahmad <sup>1</sup> and Sami Ullah <sup>6</sup>

- <sup>1</sup> Department of Physics, University of Malakand, Chakdara 18800, Khyber Pakhtunkhwa, Pakistan; farooqphysics@uom.edu.pk (F.U.); ahma5532@gmail.com (I.A.)
  - <sup>2</sup> Department of Mathematics, Shaheed Benazir Bhutto University, Sheringal 18000, Dir (Upper), Khyber Pakhtunkhwa, Pakistan; zebsbbu@gmail.com
  - <sup>3</sup> Department of Physics, University of Peshawar, Peshawar 25120, Khyber Pakhtunkhwa, Pakistan
  - <sup>4</sup> Collaborative Innovation Centre for Western Ecological Safety, College of Atmospheric Sciences, Lanzhou University, Lanzhou 730000, China; huangzhongwei@lzu.edu.cn
  - <sup>5</sup> National Institute of Lasers and Optronics College, Pakistan Institute of Engineering and Applied Sciences (NILOP-C, PIEAS), Nilore 44000, Islamabad, Pakistan; attashah168@gmail.com
  - <sup>6</sup> Department of Forestry, Shaheed Benazir Bhutto University, Sheringal 18000, Dir (Upper), Khyber Pakhtunkhwa, Pakistan; Sami.ullah@sbbu.edu.pk
- \* Correspondence: khalalam@uop.edu.pk

**Citation:** Usman, F.; Zeb, B.; Alam, K.; Huang, Z.; Shah, A.; Ahmad, I.; Ullah, S. In-Depth Analysis of Physicochemical Properties of Particulate Matter (PM<sub>10</sub>, PM<sub>2.5</sub> and PM<sub>1</sub>) and Its Characterization through FTIR, XRD and SEM–EDX Techniques in the Foothills of the Hindu Kush Region of Northern Pakistan. *Atmosphere* **2022**, *13*, 124. <https://doi.org/10.3390/atmos13010124>

Academic Editor: Jim Kelly

Received: 20 November 2021

Accepted: 7 January 2022

Published: date

**Publisher's Note:** MDPI stays neutral with regard to jurisdictional claims in published maps and institutional affiliations.

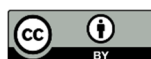

**Copyright:** © 2022 by the authors. Licensee MDPI, Basel, Switzerland. This article is an open access article distributed under the terms and conditions of the Creative Commons Attribution (CC BY) license (<https://creativecommons.org/licenses/by/4.0/>).

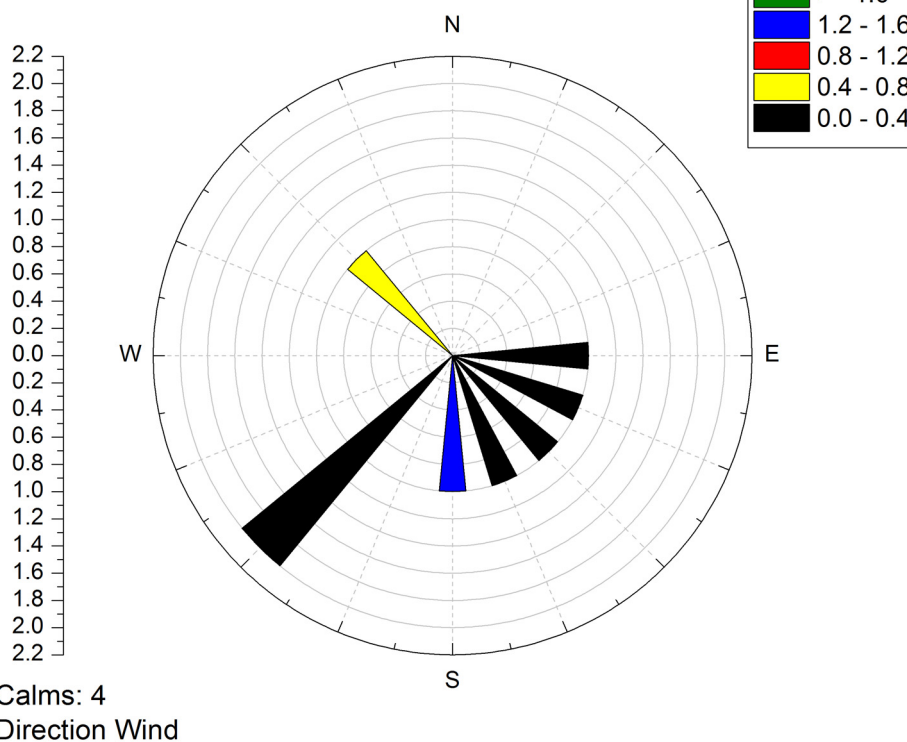

**Figure S1.** Prevailing wind speed and wind direction during the study period at the observation site.
